# Supplementary material for: A fresh look at the structural diversity of dibenzoylmethanide complexes of lanthanides
Source: Royal Society of Chemistry journal article supplement (doi:10.1039/c9nj02059d), 2019-01-01
Supplement: c9nj02059d1.pdf [file c9nj02059d1.pdf]

## Supporting information

T.S. Sukhikh<sup>a,b\*</sup>, D.S. Kolybalov<sup>a,b</sup>, E.K. Pylova<sup>a,b</sup>, D.A. Bashirov<sup>a,b</sup>, V.Y. Komarov<sup>a,b</sup>, N.V. Kuratieva<sup>a,b</sup>, A.I. Smolentsev<sup>a</sup>, A.N. Fitch<sup>c</sup>, S.N. Konchenko<sup>a,b</sup>

<sup>a</sup> *Nikolaev Institute of Inorganic Chemistry, Siberian Branch, Russian Academy of Sciences, 630090 Novosibirsk, Russia.*

<sup>b</sup> *Department of Natural Sciences, National Research University – Novosibirsk State University, 630090 Novosibirsk, Russia*

<sup>c</sup> *European Synchrotron Radiation Faculty, B.P. 220, Grenoble CEDEX, France*

\* *Email address [sukhikh@niic.nsc.ru](mailto:sukhikh@niic.nsc.ru)*

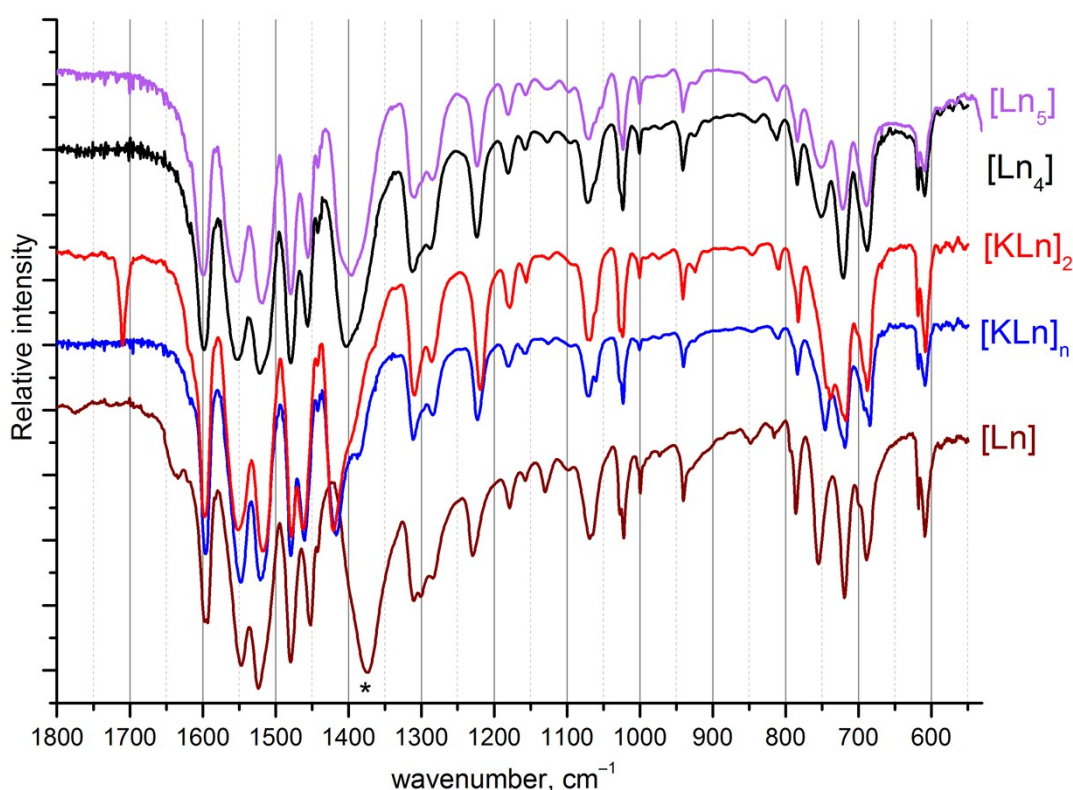

Fig. S1. Typical IR spectra of the complexes  $[\text{Ln}_5(\text{dbm})_{10}(\text{OH})_5]$  ( $[\text{Ln}_5]$ ) on the example of  $\text{Ln} = \text{Sm}$ ;  $[\text{Ln}_4(\text{dbm})_{10}(\text{OH})_2]$  ( $[\text{Ln}_4]$ ),  $[\text{K}(\text{Me}_2\text{CO})\text{Ln}(\text{dbm})_4]_2$  ( $[\text{KLn}_2]$ ),  $[\text{KLn}(\text{dbm})_4]_n$  ( $[\text{KLn}]_n$ ) and  $[\text{Ln}(\text{dbm})_3(\text{H}_2\text{O})]$  ( $[\text{Ln}]$ ) on the example of  $\text{Ln} = \text{Eu}$ . The most notable band difference is marked with asterisk. In the spectrum of  $[\text{K}(\text{Me}_2\text{CO})\text{Ln}(\text{dbm})_4]_2$ , the band at  $1702 \text{ cm}^{-1}$  corresponds to coordinated acetone.

Table S1. Crystallographic data of the complexes. Due to poor data quality for  $[\text{Nd}_3(\text{dbm})_8(\text{OH})(\text{H}_2\text{O})]\cdot 3.5\text{C}_7\text{H}_8$  and  $[\text{K}(\text{Me}_2\text{CO})\text{Eu}(\text{dbm})_4]_2$ , only the unit cell parameters are listed.

| Compound                                              | $[\text{Dy}(\text{dbm})_3(\text{H}_2\text{O})]$                    | $[\text{KYb}(\text{dbm})_4]_n \cdot n\text{C}_7\text{H}_8$          | $[\text{KEu}(\text{dbm})_4]_n \cdot n\text{C}_7\text{H}_8$         | $[\text{KEu}(\text{dbm})_3(\text{OBz})]_n$                          | $[\text{K}(\text{Me}_2\text{CO})\text{Dy}(\text{dbm})_4]_2$         | $[\text{K}(\text{Me}_2\text{CO})\text{Eu}(\text{dbm})_4]_2$      | $[\text{Nd}_3(\text{dbm})_8(\text{OH})(\text{H}_2\text{O})] \cdot 3.5\text{C}_7\text{H}_8$ | $[\text{Nd}_4(\text{dbm})_{10}(\text{OH})_2] \cdot \text{C}_7\text{H}_8$ | $[\text{Sm}_5(\text{dbm})_{10}(\text{OH})_5] \cdot 3.5\text{C}_7\text{H}_8$ |
|-------------------------------------------------------|--------------------------------------------------------------------|---------------------------------------------------------------------|--------------------------------------------------------------------|---------------------------------------------------------------------|---------------------------------------------------------------------|------------------------------------------------------------------|--------------------------------------------------------------------------------------------|--------------------------------------------------------------------------|-----------------------------------------------------------------------------|
| Empirical formula                                     | $\text{C}_{45}\text{H}_{35}\text{DyO}_7$                           | $\text{C}_{62}\text{H}_{48}\text{Cl}_4\text{KO}_8\text{Yb}$         | $\text{C}_{62}\text{H}_{48}\text{Cl}_4\text{EuKO}_8$               | $\text{C}_{52}\text{H}_{38}\text{EuKO}_8$                           | $\text{C}_{126}\text{H}_{100}\text{Dy}_2\text{K}_2\text{O}_{18}$    | $\text{C}_{126}\text{H}_{100}\text{Eu}_2\text{K}_2\text{O}_{18}$ | $\text{C}_{144.5}\text{H}_{116}\text{Nd}_3\text{O}_{18}$                                   | $\text{C}_{157}\text{H}_{120}\text{Nd}_4\text{O}_{22}$                   | $\text{C}_{153.5}\text{H}_{122}\text{Cl}_7\text{O}_{25}\text{Sm}_5$         |
| Formula weight                                        | 850.23                                                             | 1274.94                                                             | 1253.86                                                            | 981.88                                                              | 2305.25                                                             | 2284.17                                                          | 2573.09                                                                                    | 2935.47                                                                  | 3366.40                                                                     |
| Temperature/K                                         | 298(2)                                                             | 150(2)                                                              | 150(2)                                                             | 150(2)                                                              | 150(2)                                                              | 150(2)                                                           | 100(2)                                                                                     | 150(2)                                                                   | 150(2)                                                                      |
| Space group                                           | <i>R</i> 3                                                         | <i>C</i> 2/ <i>c</i>                                                | <i>C</i> 2/ <i>c</i>                                               | <i>P</i> 2 <sub>1</sub> / <i>c</i>                                  | <i>C</i> 2/ <i>c</i>                                                | <i>C</i> 2/ <i>c</i>                                             | <i>P</i> -1                                                                                | <i>P</i> -1                                                              | <i>P</i> 2 <sub>1</sub> / <i>c</i>                                          |
| <i>a</i> /Å                                           | 22.7056(10)                                                        | 28.0739(8)                                                          | 27.8136(7)                                                         | 13.6797(4)                                                          | 28.8124(5)                                                          | 28.829(3)                                                        | 17.301(3)                                                                                  | 15.0415(5)                                                               | 22.1650(11)                                                                 |
| <i>b</i> /Å                                           | 22.7056(10)                                                        | 7.8185(2)                                                           | 7.8790(2)                                                          | 13.7983(3)                                                          | 28.9292(5)                                                          | 28.898(3)                                                        | 18.304(3)                                                                                  | 15.0538(6)                                                               | 17.4192(6)                                                                  |
| <i>c</i> /Å                                           | 6.3514(3)                                                          | 25.6588(7)                                                          | 25.9138(6)                                                         | 23.4521(6)                                                          | 26.2157(5)                                                          | 26.326(2)                                                        | 21.227(4)                                                                                  | 16.1542(6)                                                               | 36.6500(18)                                                                 |
| $\alpha$ /°                                           | 90                                                                 | 90                                                                  | 90                                                                 | 90                                                                  | 90                                                                  | 90                                                               | 68.498(4)                                                                                  | 78.7490(10)                                                              | 90                                                                          |
| $\beta$ /°                                            | 90                                                                 | 108.7876(8)                                                         | 108.8290(10)                                                       | 102.9380(10)                                                        | 104.6080(10)                                                        | 104.501(3)                                                       | 77.063(4)                                                                                  | 66.6210(10)                                                              | 100.372(2)                                                                  |
| $\gamma$ /°                                           | 120                                                                | 90                                                                  | 90                                                                 | 90                                                                  | 90                                                                  | 90                                                               | 76.663(5)                                                                                  | 74.1200(10)                                                              | 90                                                                          |
| Volume/Å <sup>3</sup>                                 | 2835.7(3)                                                          | 5331.9(3)                                                           | 5374.9(2)                                                          | 4314.36(19)                                                         | 21144.9(7)                                                          | 21234(3)                                                         | 6013.0(19)                                                                                 | 3213.8(2)                                                                | 13919.2(11)                                                                 |
| Z                                                     | 3                                                                  | 4                                                                   | 4                                                                  | 4                                                                   | 8                                                                   | 8                                                                | 2                                                                                          | 1                                                                        | 4                                                                           |
| $\rho_{\text{calc}}/\text{cm}^3$                      | 1.494                                                              | 1.588                                                               | 1.549                                                              | 1.512                                                               | 1.448                                                               |                                                                  |                                                                                            | 1.516                                                                    | 1.606                                                                       |
| $\mu/\text{mm}^{-1}$                                  | 2.028                                                              | 2.090                                                               | 1.501                                                              | 1.607                                                               | 1.551                                                               |                                                                  |                                                                                            | 1.661                                                                    | 2.282                                                                       |
| F(000)                                                | 1281.0                                                             | 2564.0                                                              | 2536.0                                                             | 1984.0                                                              | 9360.0                                                              |                                                                  |                                                                                            | 1476.0                                                                   | 6688.0                                                                      |
| 2 $\theta$ range for data collection/°                | 6.216 to 51.618                                                    | 3.064 to 59.58                                                      | 3.094 to 55.178                                                    | 3.448 to 57.586                                                     | 2.028 to 57.524                                                     |                                                                  |                                                                                            | 3.022 to 54.39                                                           | 2.992 to 51.364                                                             |
| Index ranges                                          | -27 ≤ <i>h</i> ≤ 27,<br>-27 ≤ <i>k</i> ≤ 27,<br>-5 ≤ <i>l</i> ≤ 7  | -34 ≤ <i>h</i> ≤ 38,<br>-10 ≤ <i>k</i> ≤ 10,<br>-35 ≤ <i>l</i> ≤ 35 | -27 ≤ <i>h</i> ≤ 36,<br>-8 ≤ <i>k</i> ≤ 10,<br>-33 ≤ <i>l</i> ≤ 33 | -18 ≤ <i>h</i> ≤ 18,<br>-12 ≤ <i>k</i> ≤ 18,<br>-31 ≤ <i>l</i> ≤ 31 | -37 ≤ <i>h</i> ≤ 38,<br>-39 ≤ <i>k</i> ≤ 36,<br>-35 ≤ <i>l</i> ≤ 35 |                                                                  |                                                                                            | -19 ≤ <i>h</i> ≤ 11,<br>-19 ≤ <i>k</i> ≤ 19,<br>-20 ≤ <i>l</i> ≤ 16      | -26 ≤ <i>h</i> ≤ 27,<br>-21 ≤ <i>k</i> ≤ 20,<br>-44 ≤ <i>l</i> ≤ 44         |
| Reflections collected                                 | 5976                                                               | 22144                                                               | 17168                                                              | 75372                                                               | 136904                                                              |                                                                  |                                                                                            | 25267                                                                    | 107404                                                                      |
| Independent reflections                               | 2087<br>[ <i>R</i> <sub>int</sub> = 0.0354]                        | 7506<br>[ <i>R</i> <sub>int</sub> = 0.0259]                         | 6210<br>[ <i>R</i> <sub>int</sub> = 0.0229]                        | 11216<br>[ <i>R</i> <sub>int</sub> = 0.0275]                        | 27414<br>[ <i>R</i> <sub>int</sub> = 0.0394]                        |                                                                  |                                                                                            | 14199<br>[ <i>R</i> <sub>int</sub> = 0.0248]                             | 26411<br>[ <i>R</i> <sub>int</sub> = 0.0496]                                |
| restraints/parameters                                 | 49/160                                                             | 0/344                                                               | 0/344                                                              | 0/559                                                               | 0/1341                                                              |                                                                  |                                                                                            | 145/832                                                                  | 1428/1861                                                                   |
| Goodness-of-fit on F <sup>2</sup>                     | 1.058                                                              | 1.086                                                               | 1.047                                                              | 1.053                                                               | 1.033                                                               |                                                                  |                                                                                            | 1.027                                                                    | 1.159                                                                       |
| Final R indexes [ <i>I</i> ≥ 2 $\sigma$ ( <i>I</i> )] | <i>R</i> <sub>1</sub> = 0.0236,<br><i>wR</i> <sub>2</sub> = 0.0587 | <i>R</i> <sub>1</sub> = 0.0303,<br><i>wR</i> <sub>2</sub> = 0.0717  | <i>R</i> <sub>1</sub> = 0.0245,<br><i>wR</i> <sub>2</sub> = 0.0582 | <i>R</i> <sub>1</sub> = 0.0199,<br><i>wR</i> <sub>2</sub> = 0.0460  | <i>R</i> <sub>1</sub> = 0.0274,<br><i>wR</i> <sub>2</sub> = 0.0598  |                                                                  |                                                                                            | <i>R</i> <sub>1</sub> = 0.0446,<br><i>wR</i> <sub>2</sub> = 0.1057       | <i>R</i> <sub>1</sub> = 0.0704,<br><i>wR</i> <sub>2</sub> = 0.1453          |
| Final R indexes [all data]                            | <i>R</i> <sub>1</sub> = 0.0236,<br><i>wR</i> <sub>2</sub> = 0.0587 | <i>R</i> <sub>1</sub> = 0.0405,<br><i>wR</i> <sub>2</sub> = 0.0759  | <i>R</i> <sub>1</sub> = 0.0305,<br><i>wR</i> <sub>2</sub> = 0.0613 | <i>R</i> <sub>1</sub> = 0.0240,<br><i>wR</i> <sub>2</sub> = 0.0483  | <i>R</i> <sub>1</sub> = 0.0376,<br><i>wR</i> <sub>2</sub> = 0.0654  |                                                                  |                                                                                            | <i>R</i> <sub>1</sub> = 0.0720,<br><i>wR</i> <sub>2</sub> = 0.1224       | <i>R</i> <sub>1</sub> = 0.1040,<br><i>wR</i> <sub>2</sub> = 0.1668          |
| Largest diff. peak/hole / e Å <sup>-3</sup>           | 0.55/-0.38                                                         | 1.06/-1.17                                                          | 0.93/-0.60                                                         | 0.59/-0.49                                                          | 1.30/-1.20                                                          |                                                                  |                                                                                            | 1.67/-1.19                                                               | 3.41/-1.82                                                                  |

Table S2. Average Ln–O and K–O bond lengths with standard deviation in the complexes, Å. Chel. abbreviation is for chelate dbm<sup>−</sup>, chel.-br. – for chelate-bridging, bis-chel.-br. – for bis-chelate-bridging ones.

| Compound                                                                                    | Ln–OH <sub>x</sub> * | Ln–O (chel.) | Ln–O (chel.-br.) | Ln–O (bis-chel.-br.) | K–O     |
|---------------------------------------------------------------------------------------------|----------------------|--------------|------------------|----------------------|---------|
| [Dy(dbm) <sub>3</sub> (H <sub>2</sub> O)]                                                   | 2.415(8)             | 2.30(1)      | –                | –                    | –       |
| [KYb(dbm) <sub>4</sub> ] <sub>n</sub> ·2nCH <sub>2</sub> Cl <sub>2</sub>                    | –                    | 2.32(3)      | –                | –                    | 2.94(2) |
| [KEu(dbm) <sub>4</sub> ] <sub>n</sub> ·2nCH <sub>2</sub> Cl <sub>2</sub>                    | –                    | 2.40(3)      | –                | –                    | 2.91(1) |
| [KEu(dbm) <sub>3</sub> (OBz)] <sub>n</sub>                                                  | –                    | 2.38(3)      | –                | –                    | 2.76(6) |
| [K(Me <sub>2</sub> CO)Dy(dbm) <sub>4</sub> ] <sub>2</sub>                                   | –                    | 2.35(4)      | –                | –                    | 2.66(9) |
| [Nd <sub>4</sub> (dbm) <sub>10</sub> (OH) <sub>2</sub> ]·C <sub>7</sub> H <sub>8</sub>      | 2.44(2)              | 2.37(2)      | 2.44(2)          | 2.54(3)              | –       |
| [Sm <sub>5</sub> (dbm) <sub>10</sub> (OH) <sub>5</sub> ]·3.5CH <sub>2</sub> Cl <sub>2</sub> | 2.41(4)<br>2.63(7)** | 2.35(2)      | 2.43(5)          | –                    | –       |

\* x = 1, 2

\*\* the first distance is for μ<sub>3</sub>-OH, the second one is for μ<sub>4</sub>-OH.

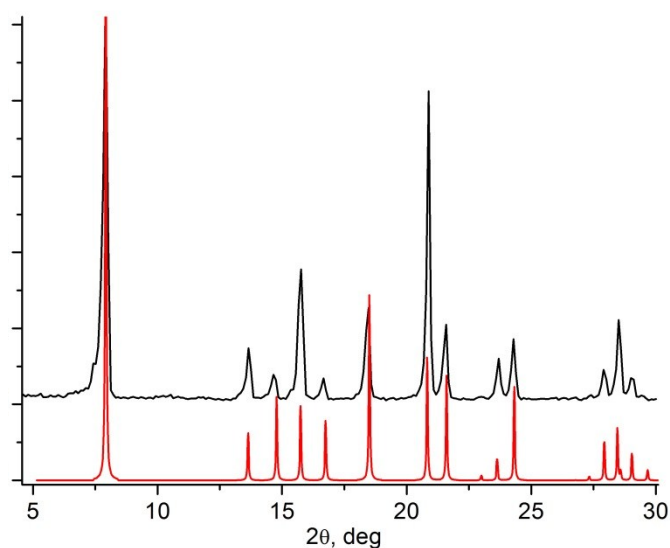

Fig. S2. Experimental (top) and simulated (bottom) powder XRD patterns for the complexes [Ln(dbm)<sub>3</sub>(H<sub>2</sub>O)] on the example of Ln = Eu.

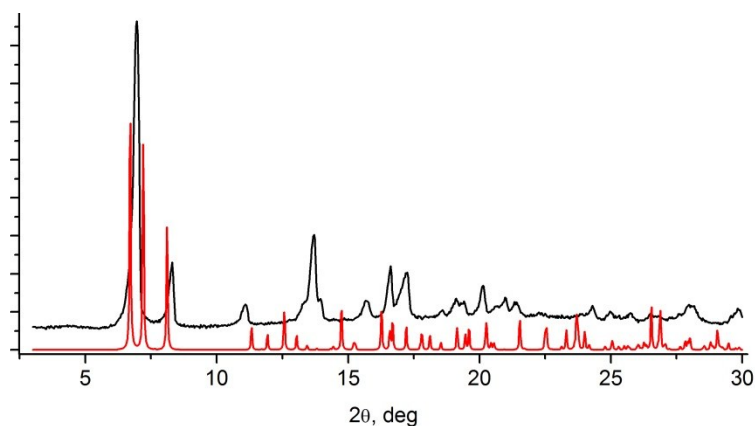

Fig. S3. Experimental (top) and simulated (bottom) powder XRD patterns for the complexes [Ln(dbm)<sub>4</sub>]<sub>n</sub> on the example of Ln = Dy.

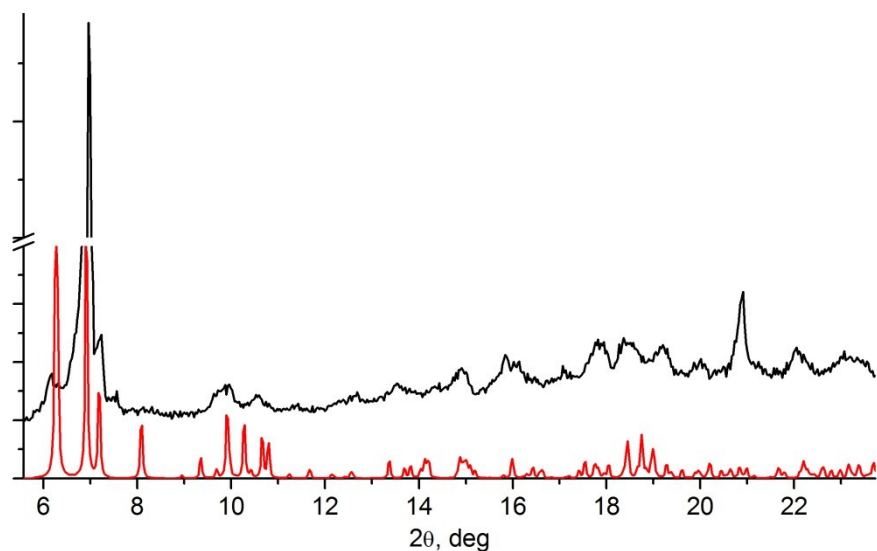

Fig. S4. Experimental (top) and simulated (bottom) powder XRD patterns for the complexes  $[\text{K}(\text{Me}_2\text{CO})\text{Ln}(\text{dbm})_4]_2$  on the example of  $\text{Ln} = \text{Dy}$ .

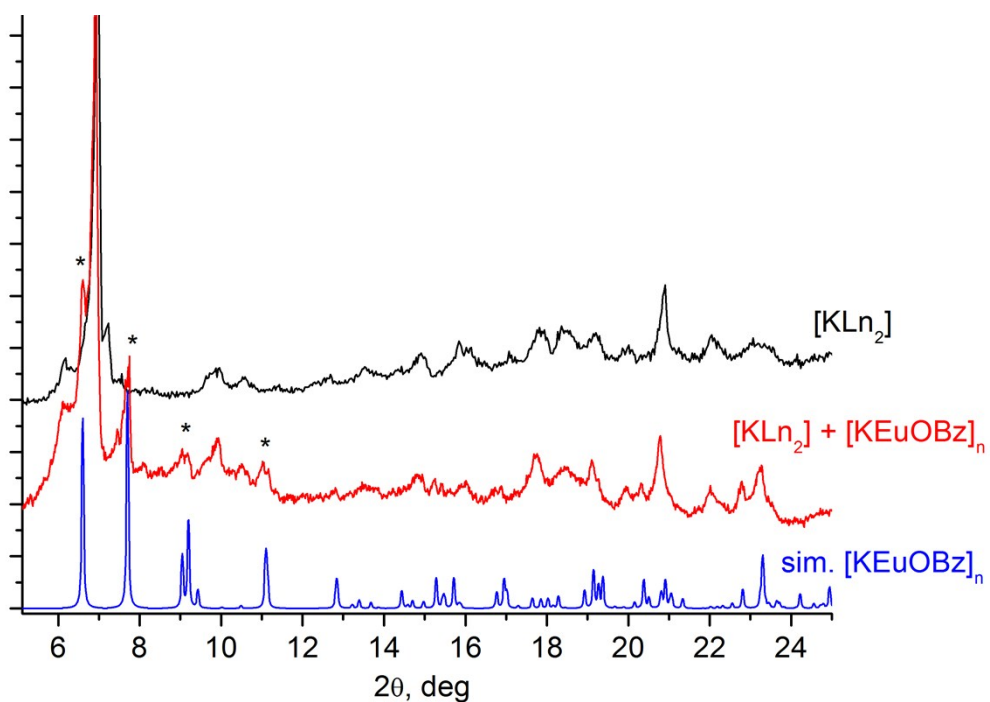

Fig. S5. Experimental powder XRD patterns for  $[\text{K}(\text{Me}_2\text{CO})\text{Ln}(\text{dbm})_4]_2$  ( $[\text{KLn}_2]$ ), the mixture of products  $[\text{K}(\text{Me}_2\text{CO})\text{Ln}(\text{dbm})_4]_2$  and  $[\text{KEu}(\text{dbm})_3(\text{OBz})]_n$  ( $[\text{KLn}_2] + [\text{KEuOBz}]_n$ ) and simulated one for  $[\text{KEu}(\text{dbm})_3(\text{OBz})]_n$  ( $[\text{KEuOBz}]_n$ ). The most notable peaks referred to  $[\text{KEu}(\text{dbm})_3(\text{OBz})]_n$  marked with asterisk.

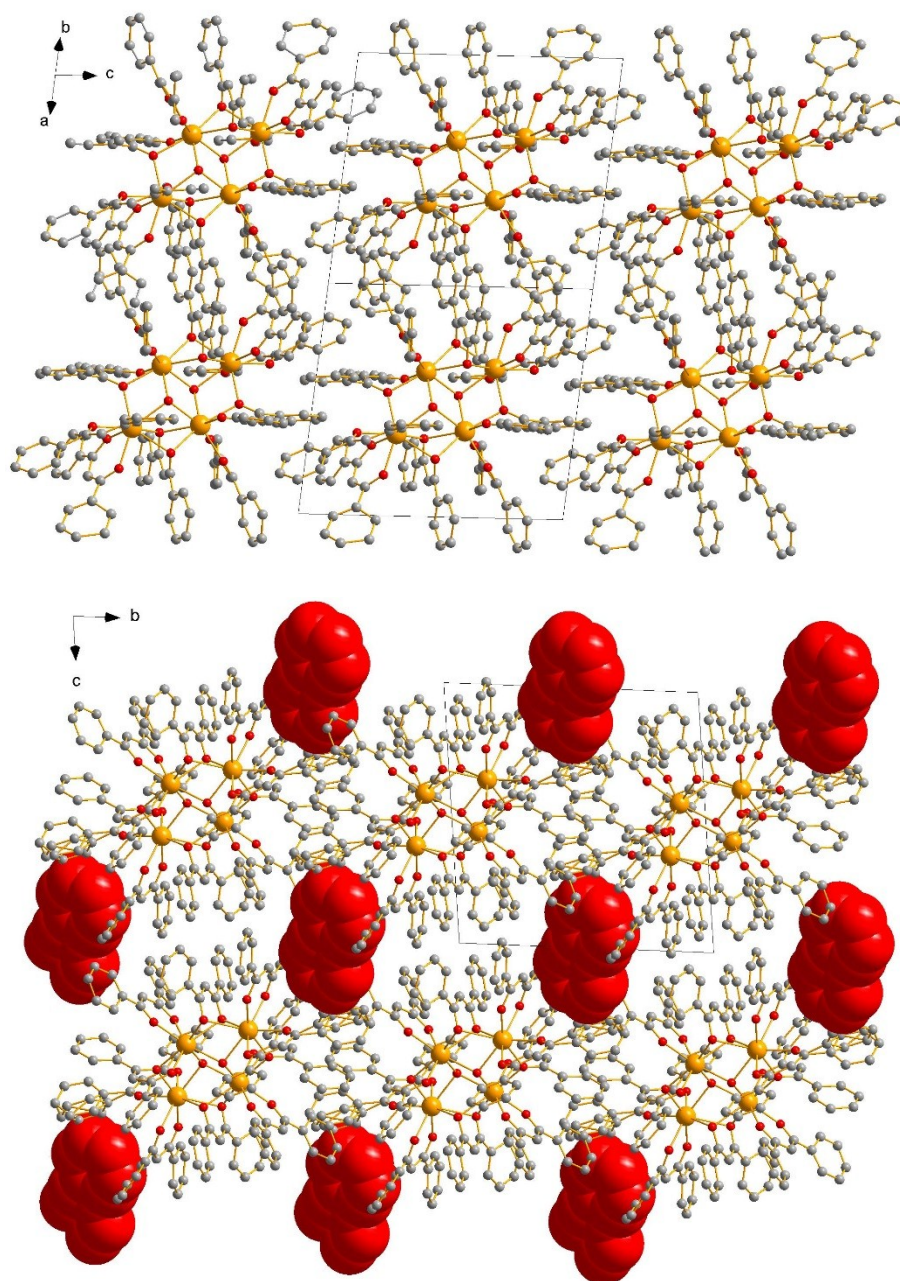

Fig. S6. Crystal packing of the complexes  $[\text{Nd}_4(\text{dbm})_{10}(\text{OH})_2]$ , top (V. Baskar, P.W. Roesky, Z. Anorg. Allg. Chem., 631 (2005) 2782-2785) and  $[\text{Nd}_4(\text{dbm})_{10}(\text{OH})_2] \cdot \text{C}_7\text{H}_8$  obtained in this work, bottom. Solvate toluene molecules are shown in space-filling model (red).

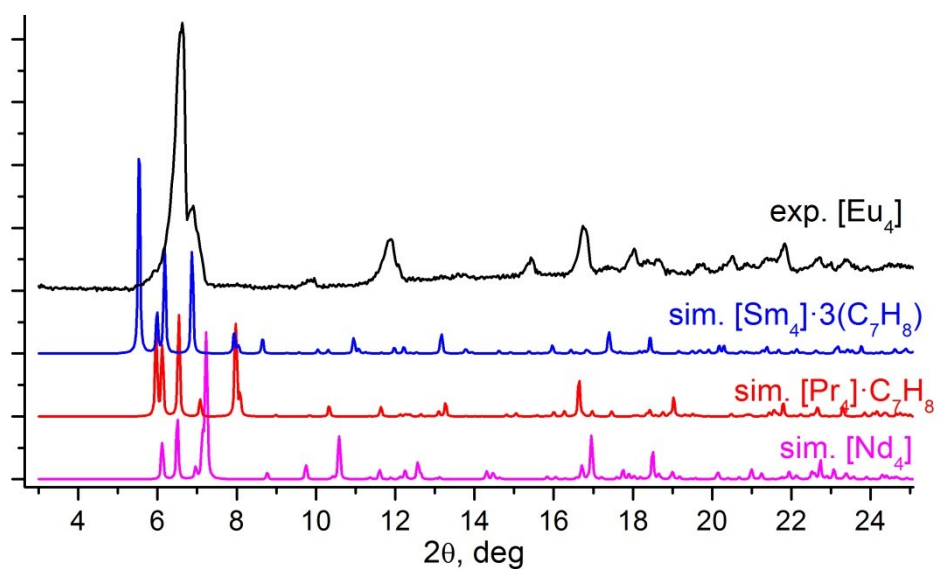

Fig. S7. Experimental and simulated powder XRD patterns for the complexes  $[\text{Ln}_4(\text{dbm})_{10}(\text{OH})_2]$  on the example of  $\text{Ln} = \text{Eu}$ .

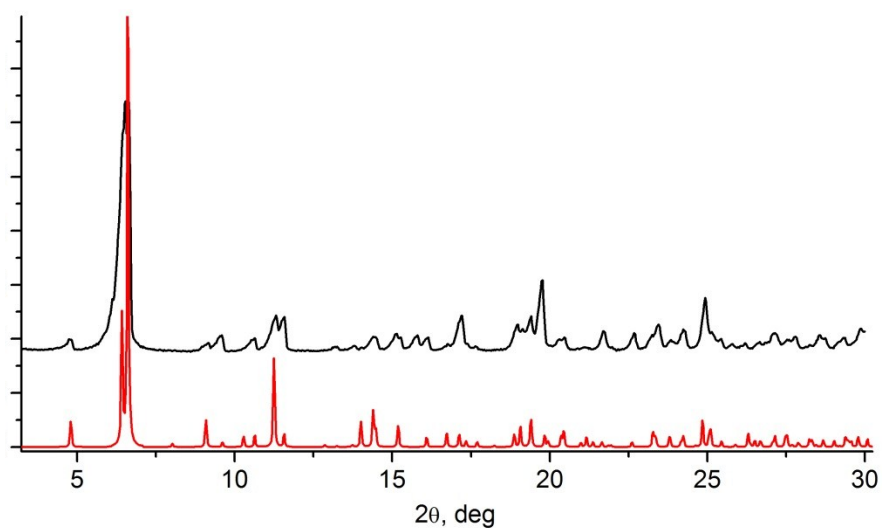

Fig. S8. Experimental (top) and simulated (bottom) powder XRD patterns for the complexes  $[\text{Ln}_5(\text{dbm})_{10}(\text{OH})_5]$  ( $P4/n$  space group) on the example of  $\text{Ln} = \text{Yb}$ .

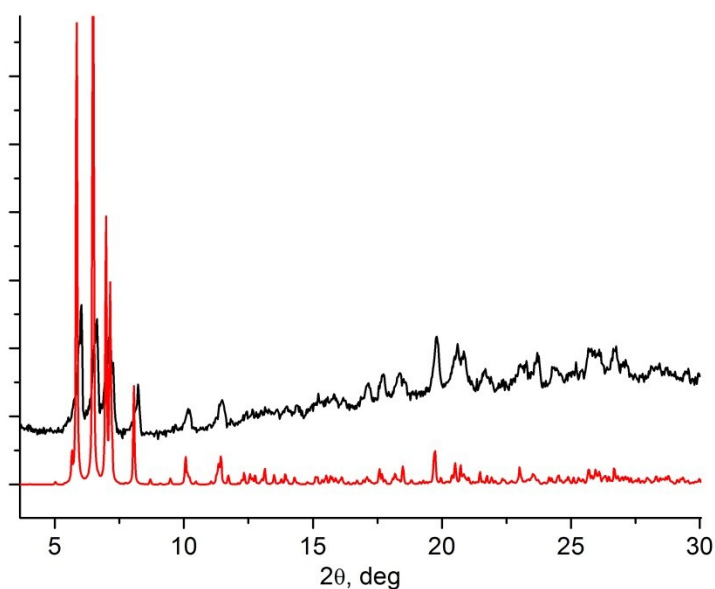

Fig. S9. Experimental (top) and simulated (bottom) powder XRD patterns for the complexes  $[\text{Ln}_5(\text{dbm})_{10}(\text{OH})_5]$  ( $P2_1/c$  space group) on the example of  $\text{Ln} = \text{Sm}$ .

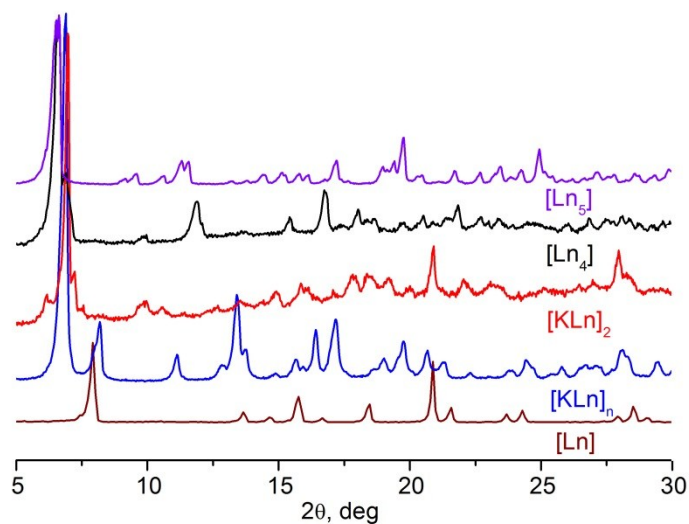

Fig. S10. Experimental powder XRD patterns for all of the types of the complexes, viz.  $[\text{Ln}_5(\text{dbm})_{10}(\text{OH})_5]$  ( $[\text{Ln}_5]$ ),  $[\text{Ln}_4(\text{dbm})_{10}(\text{OH})_2]$  ( $[\text{Ln}_4]$ ),  $[\text{K}(\text{Me}_2\text{CO})\text{Ln}(\text{dbm})_4]_2$  ( $[\text{KLn}_2]$ ),  $[\text{KLn}(\text{dbm})_4]_n$  ( $[\text{KLn}_n]$ ) and  $[\text{Ln}(\text{dbm})_3(\text{H}_2\text{O})]$  ( $[\text{Ln}]$ ).

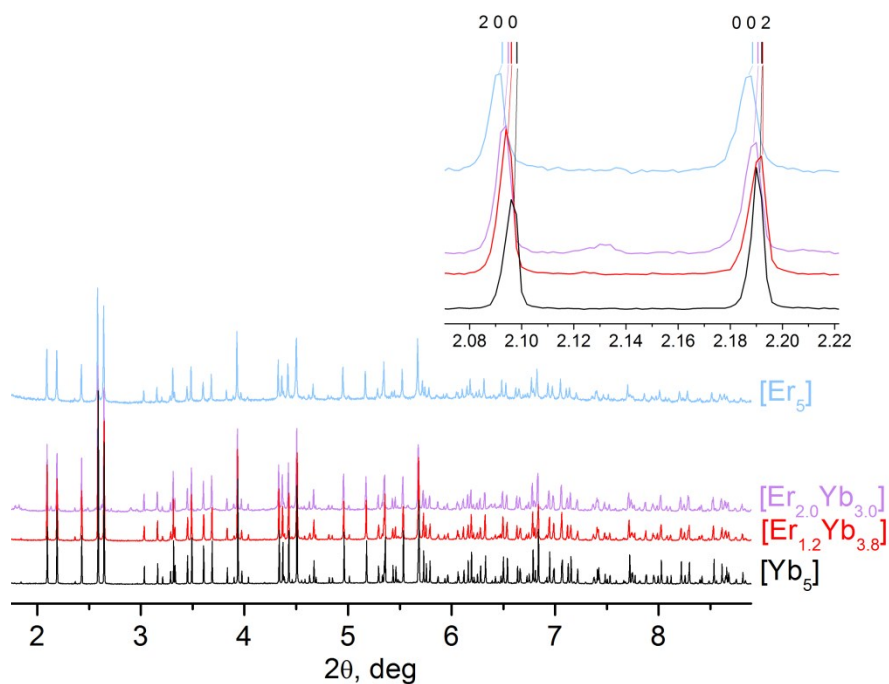

Fig. S11. High-resolution powder XRD patterns of the complexes  $[\text{Er}_5(\text{dbm})_{10}(\text{OH})_5]$  (**Er<sub>5</sub>**),  $[\text{Yb}_5(\text{dbm})_{10}(\text{OH})_5]$  (**Yb<sub>5</sub>**),  $[\text{Er}_{1.2}\text{Yb}_{3.8}(\text{dbm})_{10}(\text{OH})_5]$  (**Er<sub>1.2</sub>Yb<sub>3.8</sub>**) and  $[\text{Er}_{2.0}\text{Yb}_{3.0}(\text{dbm})_{10}(\text{OH})_5]$  (**Er<sub>2.0</sub>Yb<sub>3.0</sub>**). Detailed view of the peaks (2 0 0) and (0 0 2) is in the inset. Vertical lines show position of the reflections defined by Pawley method.

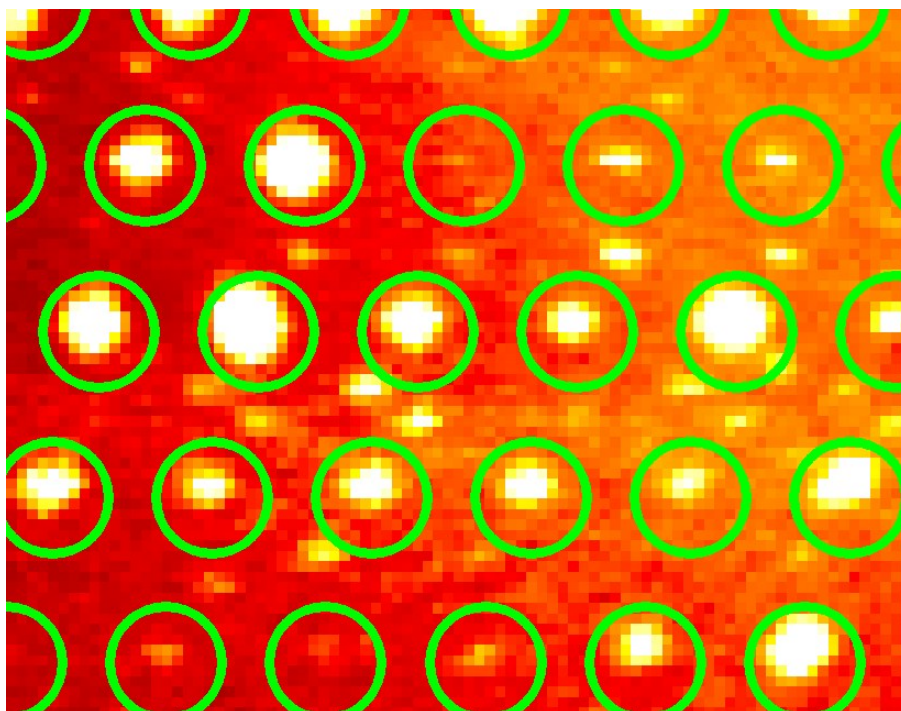

Fig. S12. Single-crystal diffraction pattern of the complex  $[\text{Nd}_3(\text{dbm})_8(\text{OH})(\text{H}_2\text{O})] \cdot 3\text{C}_7\text{H}_8$  in reciprocal space showing Bragg reflections (highlighted in green circles) and the satellites.
